# Supplementary figures and images for: Profiling the Spatial Expression Pattern and ceRNA Network of lncRNA, miRNA, and mRNA Associated with the Development of Intermuscular Bones in Zebrafish
Source: MDPI journal article supplement (doi:10.3390/biology12010075), 2022-12-31

# mRNA

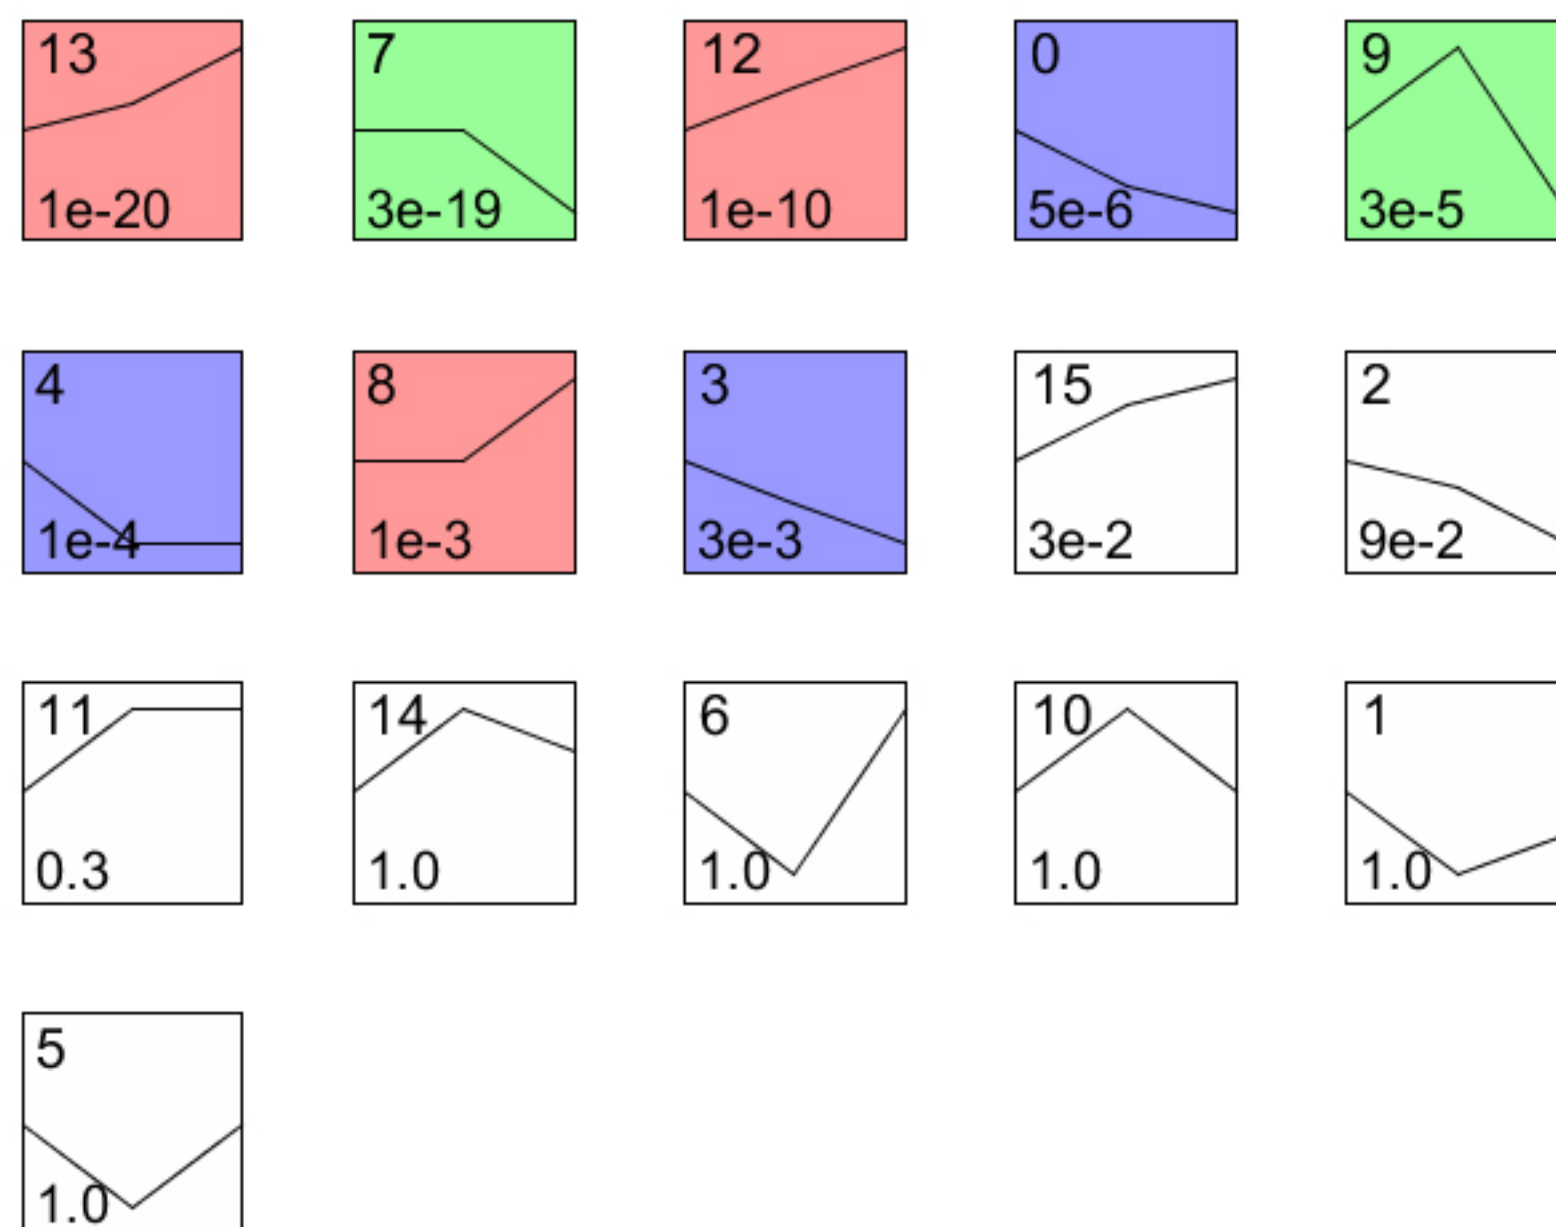

# miRNA

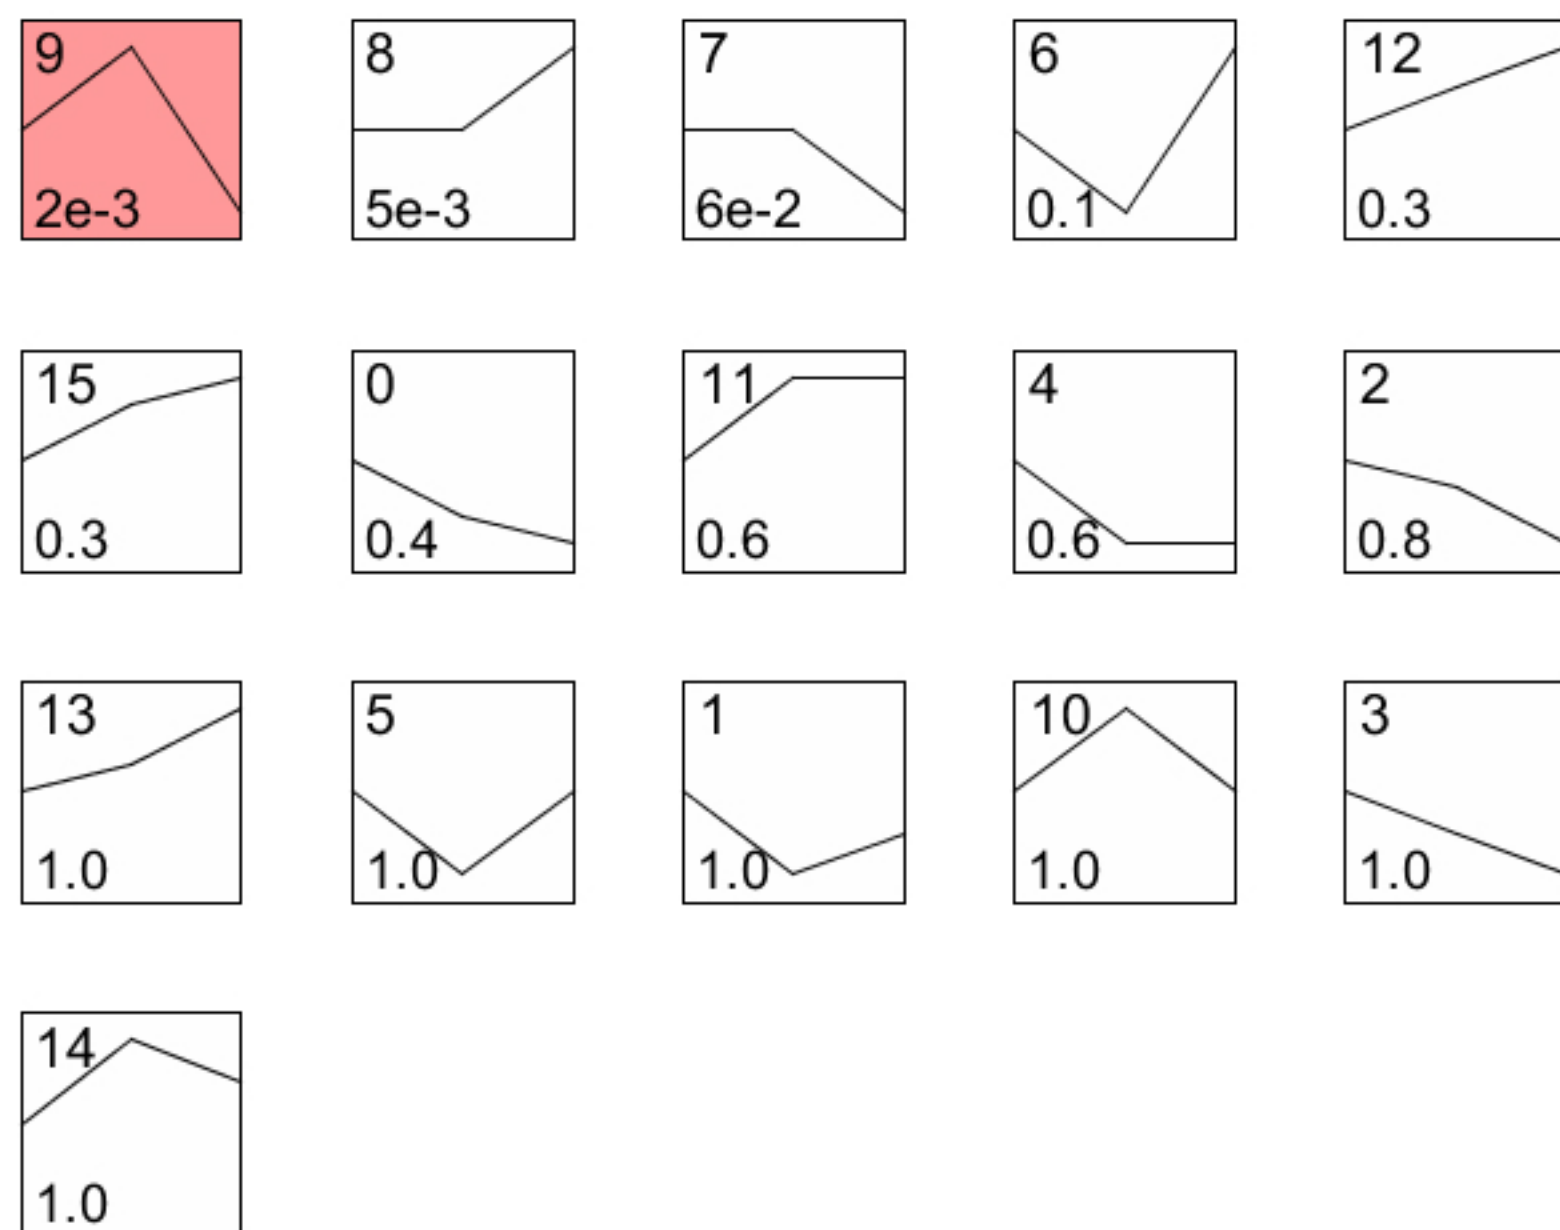

# lncRNA

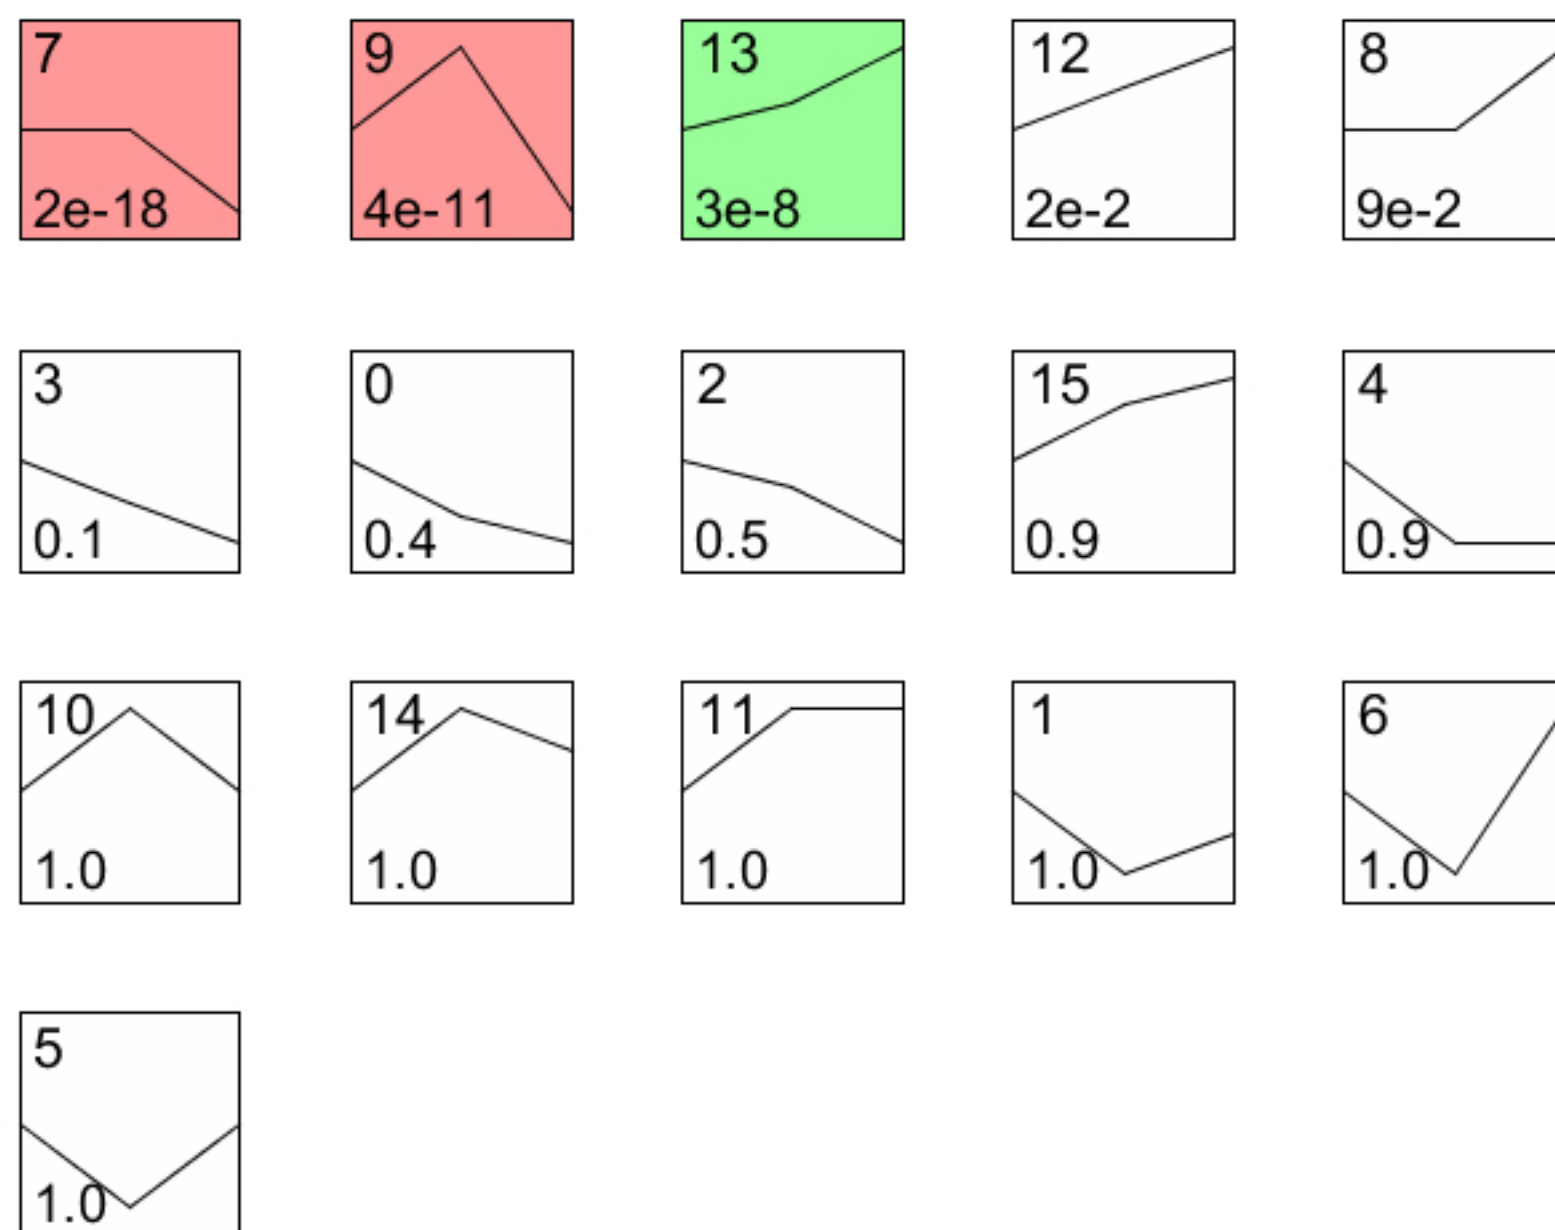

Supplement: s1 [file s1]
